# Supplementary material for: Investigation on associated factors of Mycoplasma pneumonia infection among school-age children in Shandong and Anhui Provinces of China: A retrospective case-control study
Source: Research Square preprint supplement (doi:10.21203/rs.3.rs-8571904/v1), 2026-01-29
Supplement: Supplementary file 1 [file 9b21fe79628ec9be46d1d763.docx]

**Community-Acquired Mycoplasma pneumoniae Pneumonia (MPP) Risk Factors Questionnaire (Case Group)**

**Instruction to Respondents/Guardians:**

Hello!

I am an investigator from the Chinese Center for Disease Control and Prevention / [Name of Institution in Anhui Province] / [Name of Institution in Shandong Province]. We are currently conducting a survey on the risk factors for community-acquired Mycoplasma pneumoniae pneumonia (MPP). We kindly request your participation by answering some questions. We assure you that all information provided will be kept strictly confidential. Your or your child's participation is entirely voluntary. You have the right to refuse to answer any question you are uncomfortable with.

Your participation will assist relevant national authorities in formulating related policies. Thank you for your support!

Survey Date：🞏🞏🞏🞏/🞏🞏/🞏🞏(YYYY/MM/DD)

Questionnaire ID：🞏-🞏🞏🞏-🞏-🞏🞏

**(Region-Investigator-Group-Pair Number)**

**Part 1: Child's Basic Information**

1.1 gender: ① Male ② Female

1.2 Date of Birth: □□□□/□□ (YYYY/MM)

1.3 At the time of visiting the doctor or hospital admission, did the child have any of the following symptoms? (e.g., fever, cough, or other MPP-related symptoms such as headache, runny nose, sore throat, earache, etc.)

①Yes, symptoms began ______ days ago.

②No relevant symptoms (Skip to Q1.5)

1.4 Number of days from symptom onset to confirmed diagnosis of MPP: ______ days

1.5 Case type:①Inpatient ②Outpatient ③Other ______ (Please specify)

1.5.1 Prior to admission/outpatient visit, was any cold medicine taken?

① Yes, ______ time(s) ② No

1.5.2 Prior to admission/outpatient visit, was antibiotic treatment received?

① Yes, ______ time(s) ② No (Skip to Q1.6)

1.5.2.1 Macrolides: ______ (Please specify drug), Dosage: ______, Duration: ______ days

1.5.2.2 β-lactams: ______ (Please specify drug), Dosage: ______, Duration: ______ days

1.5.2.3 Other antibiotics: ______ (Please specify drug), Dosage: ______, Duration: ______ days

1.6 Within the 1 month prior to symptom onset, did the child contract a respiratory illness such as a common cold or influenza?

① Yes, ______ time(s)? Illness: ______ ② No

1.7 Does the child have an atopic/allergic predisposition? (e.g., atopic dermatitis, allergic rhinitis, bronchial asthma, etc.)

① Yes, ______ (Please specify condition) ② No

**Part 2: Household Conditions**

2.1 Number of people living in the household: ______ persons

Including the respondent, number of school-age children: ______

2.2 Per capita living space: ______ square meters/person

2.3 Does the child share a bedroom with an adult? ①Yes ②No

(Questions 2.4-2.9 refer to the 1 month prior to symptom onset/diagnosis)

2.4 At home, was attention paid to keeping indoor windows open for ventilation?

①1-2 times/day ②3-4 times/day ③≥5 times/day ④Never

2.5 At home, was attention paid to handwashing?

①1-2 times/day ②3-4 times/day ③≥5 times/day ④Never

2.6 At home, was the elevator used for going up/down stairs?

①1-2 times/day ②3-4 times/day ③≥5 times/day ④Never

2.7 At home, was attention paid to disinfection?

①1-2 times/day ②3-4 times/day ③≥5 times/day ④Never

2.8 At home, was air conditioning used?

①1-2 times/week ②3-4 times/week ③≥5 times/week ④Never

2.9 At home, was a face mask worn?

①1-2 times/day ②3-4 times/day ③≥5 times/day ④Never

2.10Within the 1 month prior to symptom onset/diagnosis, did any cohabiting family member have confirmed MPP or similar acute respiratory symptoms?

①No

②Yes, ______ person(s). Details: ______, ______, ______, ______ (Relationship to child)

**Part 3: School Conditions**

(Questions refer to the 1 month prior to symptom onset/diagnosis)

3.1 Did the child attend school?

①1-2 times/week ②3-4 times/week

③≥5 times/week ④Did not attend

3.2 Class size during school attendance: ______ students

3.3 In the classroom, was attention paid to keeping windows open for ventilation?

①1-2 times/day ②3-4 times/day ③≥5 times/day ④Never

3.4 At school, was attention paid to handwashing?

①1-2 times/day ②3-4 times/day ③≥5 times/day ④Never

3.5 At school, was a face mask worn?

①1-2 times/day ②3-4 times/day ③≥5 times/day ④Never

3.6 At school, did the child eat in the cafeteria?

①1-2 times/day ②3-4 times/day ③≥5 times/day ④Never

3.7 At school, did the child participate in physical exercise (≥10 minutes)?

①1-2 times/week ②3-4 times/week ③≥5 times/week ④Never

3.8.1 Within the 1 month prior, did any classmate have confirmed MPP or take leave/be absent due to acute respiratory symptoms (e.g., fever, cough, runny nose)?

①No ②1-2 persons ③3-9 persons ④≥10 persons

3.8.2 Within the 1 month prior, did any teacher have confirmed MPP or take leave/be absent due to acute respiratory symptoms?

①No ②1-2 persons ③3-9 persons ④≥10 persons

**Part 4: Other Outings/Activities**

(Questions refer to the 1 month prior to symptom onset/diagnosis)

4.1 Did the child attend extracurricular interest classes?

①1-2 times/week ②3-4 times/week ③≥5 times/week ④Never

4.2Did the child use "Xiao Fan Zhuo" (off-campus lunch/after-school care)?

①1-2 times/week ②3-4 times/week ③≥5 times/week ④Never

4.3 Did the child visit shopping malls/supermarkets?

①1-2 times/week ②3-4 times/week ③≥5 times/week ④Never

4.4 Did the child go to the cinema to watch movies?

①1-2 times/week ②3-4 times/week ③≥5 times/week ④Never

4.5 Did the child visit hotels?

①1-2 times/week ②3-4 times/week ③≥5 times/week ④Never

4.6 Did the child visit libraries?

①1-2 times/week ②3-4 times/week ③≥5 times/week ④Never

4.7 Did the child use public transportation (e.g., subway, bus)?

①1-2 times/week ②3-4 times/week ③≥5 times/week ④Never

4.8 Did the child visit hospitals/clinics?

①1-2 times/week ②3-4 times/week ③≥5 times/week ④Never

4.9 After being outside, did the child wash hands?

①1-2 times/day ②3-4 times/day ③≥5 times/day ④Never

4.10 When outside, did the child wear a face mask?

①1-2 times/day ②3-4 times/day ③≥5 times/day ④Never

4.11 Within the 1 month prior, did the child travel away from or reside outside the home city?

① Yes, Destination: ______ (Please specify), Duration: ______ days

② No

4.12 Within the 1 month prior, did the child travel abroad or reside overseas?

① Yes, Destination: ______ (Please specify), Duration: ______ days

② No

**Community-Acquired Mycoplasma pneumoniae Pneumonia (MPP) Risk Factors Questionnaire (Control Group)**

(The introductory text is identical to the Case Group version, omitted here for brevity.)

Survey Date：🞏🞏🞏🞏/🞏🞏/🞏🞏(YYYY/MM/DD)

Questionnaire ID：🞏-🞏🞏🞏-🞏-🞏🞏

**(Region-Investigator-Group-Pair Number)**

**Part 1: Child's Basic Information**

1.1 gender: ① Male ② Female

1.2 Date of Birth: □□□□/□□ (YYYY/MM)

1.3 What was the reason for this medical visit or hospital admission? ______ (Please specify illness)

1.4 Case type:

①Inpatient ②Outpatient ③Other ______ (Please specify)

1.4.1 Prior to admission/outpatient visit, was any cold medicine taken?

①Yes, ______ time(s) ②No

1.4.2 Prior to admission/outpatient visit, was antibiotic treatment received?

①Yes, ______ time(s) ②No

1.4.2.1 Macrolides: ______ (Please specify drug), Dosage: ______, Duration: ______ days

1.4.2.2 β-lactams: ______ (Please specify drug), Dosage: ______, Duration: ______ days

1.4.2.3 Other antibiotics: ______ (Please specify drug), Dosage: ______, Duration: ______ days

1.5 Within the 1 month prior to this survey date, did the child contract a respiratory illness such as a common cold or influenza?

①Yes, ______ time(s)? Illness: ______ ②No

1.6 Does the child have an atopic/allergic predisposition? (e.g., atopic dermatitis, allergic rhinitis, bronchial asthma, etc.)

①Yes, ______ (Please specify condition) ②No

**Part 2: Household Conditions**

*(Questions 2.1-2.10 are identical in structure to the Case Group, but the recall period is "Within the 1 month prior to this survey date.")*

**Part 3: School Conditions**

*(Questions 3.1-3.8.2 are identical in structure to the Case Group, but the recall period is "Within the 1 month prior to this survey date.")*

**Part 4: Other Outings/Activities**

*(Questions 4.1-4.12 are identical in structure to the Case Group, but the recall period is "Within the 1 month prior to this survey date.")*

**Questionnaire Instructions & Definitions**

**I. Questionnaire ID Coding:**

**Rule:** Region Code + Investigator Initials + Group Code + Pair Number (2-digit)

**Example:**

| **Region Code** | **Investigator** | **Group Code** | **Pair no.** | **Example** |
| --- | --- | --- | --- | --- |
| Shandong province,  Jining City (S) | Zhang Xiaojuan (ZXJ) | Case  Group (B) | 2-digit | S-ZXJ-B-01 |
| Anhui Province, Wuhu City (A) | Zhang Xingxing (ZXX) | Control Group (D) | 2-digit | A-ZXX-D-25 |

**II. Definitions:**

**1.Mycoplasma pneumoniae Pneumonia (MPP)**: Lung inflammation caused by Mycoplasma pneumoniae infection, which can involve the bronchi, bronchioles, alveoli, and lung interstitium.

**2.School-age Child**: Preschool age: 3 to 6-7 years old. School age: 6-7 years old to pre-adolescence (generally 10-12 for girls, 13-14 for boys).

**3.Cold Medicine**: Refers to various medicines used to treat the common cold, including proprietary Chinese medicines, decoctions, Western medicines, granules, etc. Most are compound preparations containing ingredients like antipyretics/analgesics, nasal decongestants, antihistamines, CNS stimulants, or antivirals.

**4.Antibiotic**: A class of drugs that can inhibit or kill bacteria, used to treat bacterial infections.

**5.Acute Respiratory Symptoms**: Includes symptoms such as cough, shortness of breath, chest pain, dyspnea, sputum production, fever, runny nose, sneezing, sore throat, etc.

**6.Disinfection**: The application of physical or chemical methods to kill or remove pathogenic microorganisms from vectors, rendering them harmless.

**7.Extracurricular Interest Class**: Courses or training classes established to cultivate children's or adolescents' interest, hobby, and expertise in a specific field or activity.

**8."Xiao Fan Zhuo"**: A venue established in residential houses near schools, providing services such as lunch, noon rest, and study guidance for primary and secondary school students.

**III. Key Notes for Investigators:**

1."Case Group" refers to newly confirmed cases meeting the case definition, where "newly confirmed" means symptom onset within one week.

2."Meeting the MPP diagnostic criteria" primarily refers to confirmation via nucleic acid PCR testing.

3.Investigators should maintain a low profile, respect respondent privacy and control the pace of the interview.

4.Investigators should lead the investigate, stay focused on the questions, and proceed sequentially. Pay close attention to differentiating between "per week" and "per day" frequency options. The first two surveys may take ~20 minutes to complete, with subsequent questionnaires taking ≤15 minutes.

**Note:** This is an English translation of the original Chinese questionnaire developed for this study. In case of any discrepancy, the original Chinese version prevails.
